# Supplementary material
Source: PubMed Central journal article supplement (PMC2453605)

## SUPPLEMENTAL FIGURE LEGENDS

**Supplemental Figure S1. ICI-mediated receptor turnover in the presence of CHX.** C4-12 ER $\alpha$  stable cells pretreated with CHX for 30 min prior to ICI (100nM) treatment for the indicated times.

Experiments were performed in duplicate and repeated twice using two ER $\alpha$  and three ER $\alpha$ -AA clones. GAPDH was used as SDS-PAGE loading control. The band density of exposed film was evaluated with ImageJ software. Relative ER $\alpha$  levels are shown in the corresponding graph as the mean  $\pm$  SE.

\*\* p<0.01.

**Supplemental Figure S2. Basal and ligand-induced ubiquitination of ER $\alpha$ K302R/K303R.** HeLa cells were transfected with 250ng ER $\alpha$ -RR, along with 1 $\mu$ g HA-ubiquitin using LipofectAMINE/PLUS. Transfected cells were pretreated with vehicle (DMSO) or MG132 (25 $\mu$ M) for 1 h, followed by DMSO, E2 (10nM) or ICI (100nM) for 4 h. ER $\alpha$  was then immunoprecipitated with anti-ER $\alpha$  antibody. Precipitated proteins were resolved by SDS-PAGE and Western blot performed with an HA antibody. Levels of immunoprecipitated ER $\alpha$  were also determined by probing with an anti-ER $\alpha$  antibody (*lower panel*).

**Supplemental Figure S3. Nuclear localization of wtER $\alpha$  and ER $\alpha$ -AA.** C4-12 cells were pretreated with vehicle (DMSO) or E2 (10nM) for 20 minutes. Whole cell fractions (W) or nuclear extracts fractions (N) were isolated and Western blot was performed for ER $\alpha$ . GAPDH was used as an SDS-PAGE loading control.

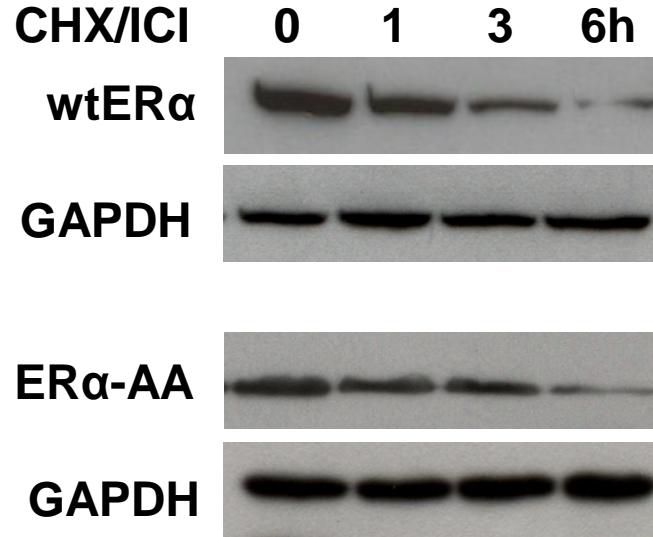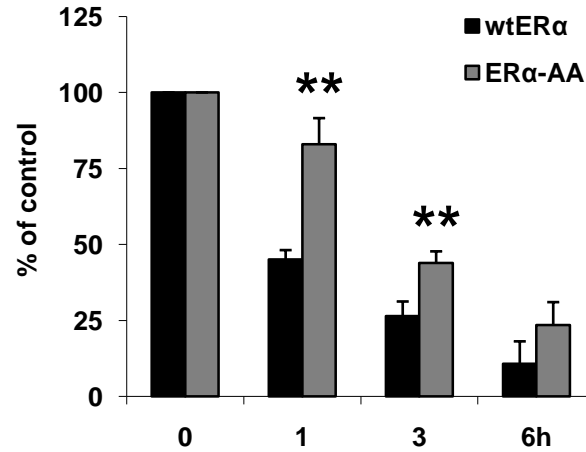

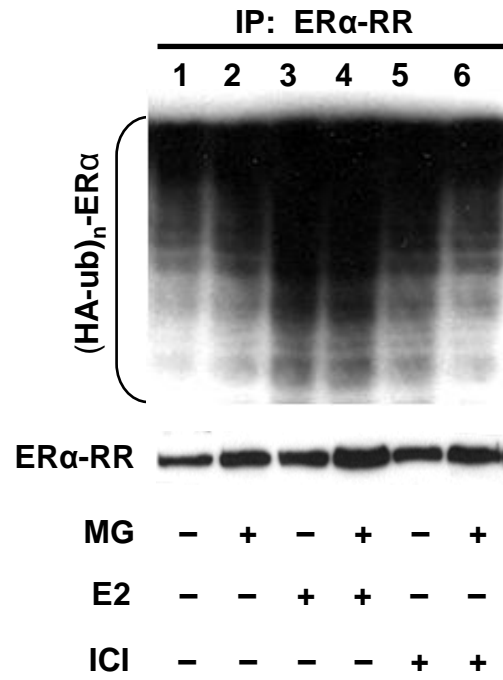

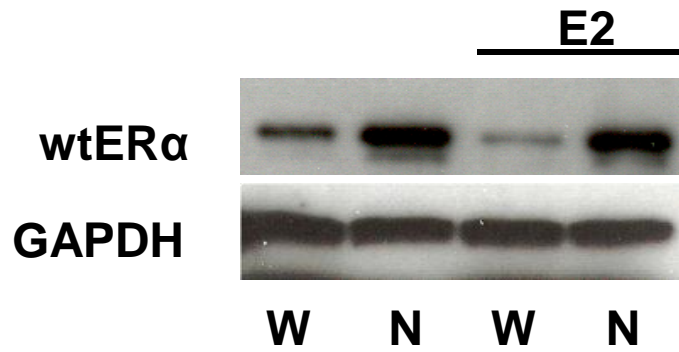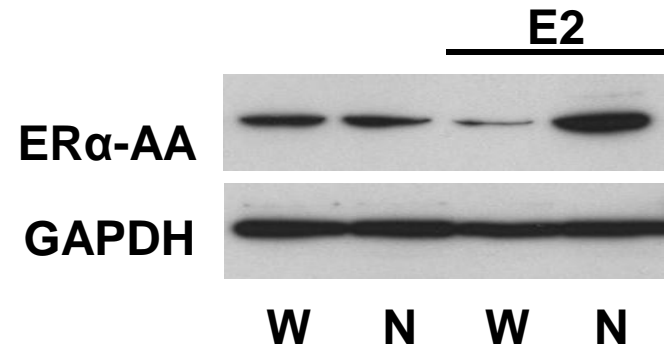

Supplement: me.2007-0449_1.pdf [file me.2007-0449_1.pdf]
